# Supplementary material for: Metal-free oxygenation of cyclohexane with oxygen catalyzed by 9-mesityl-10-methylacridinium and hydrogen chloride under visible light irradiation
Source: Royal Society of Chemistry journal article supplement (doi:10.1039/c1cc12534f), 2011-01-01
Supplement: c1cc12534f.pdf [file c1cc12534f.pdf]

# **Metal-free oxygenation of cyclohexane with oxygen catalyzed by 9-mesityl-10-methylacridinium and hydrogen chloride under visible light irradiation†**

**Kei Ohkubo,<sup>a</sup> Atsushi Fujimoto<sup>a</sup> and Shunichi Fukuzumi<sup>\*a,b</sup>**

<sup>a</sup> *Department of Material and Life Science, Graduate School of Engineering, Osaka University and ALCA, Japan Science and Technology Agency (JST), 2-1 Yamada-oka, Suita, Osaka 565-0871, Japan. Fax: +81-6-6879-7370; Tel: +81-6-6879-7368; E-mail: fukuzumi@chem.eng.osaka-u.ac.jp*

<sup>b</sup> *Department of Bioinspired Science, Ewha Womans University, Seoul, 120-750, Korea.*

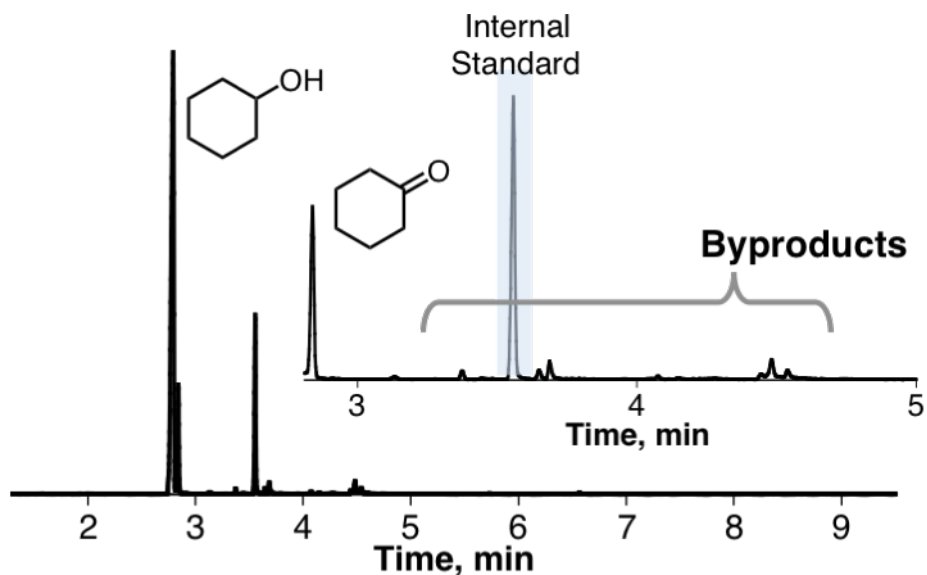

**Fig. S1** GC mass chart of the reaction mixture after photooxygenation of an O<sub>2</sub>-saturated MeCN solution containing cyclohexane (45 mM), HCl (2.0 mM) and Acr<sup>+</sup>-Mes (1.0 mM) irradiated by a xenon lamp (500 W,  $\lambda > 390$  nm) for 3h. Internal standard: benzonitrile.

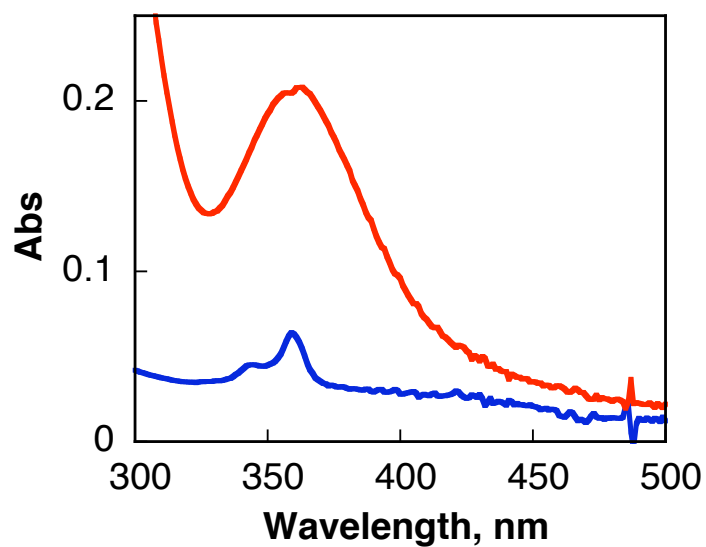

**Fig. S2** UV-vis spectra of the reaction mixture after photooxygenation of cyclohexane (45 mM) with HCl (2.0 mM) and Acr<sup>+</sup>-Mes (1.0 mM) for 3h photoirradiation by a xenon lamp (500 W,  $\lambda > 390$  nm) in MeCN in the absence (blue) and presence of NaI (red).

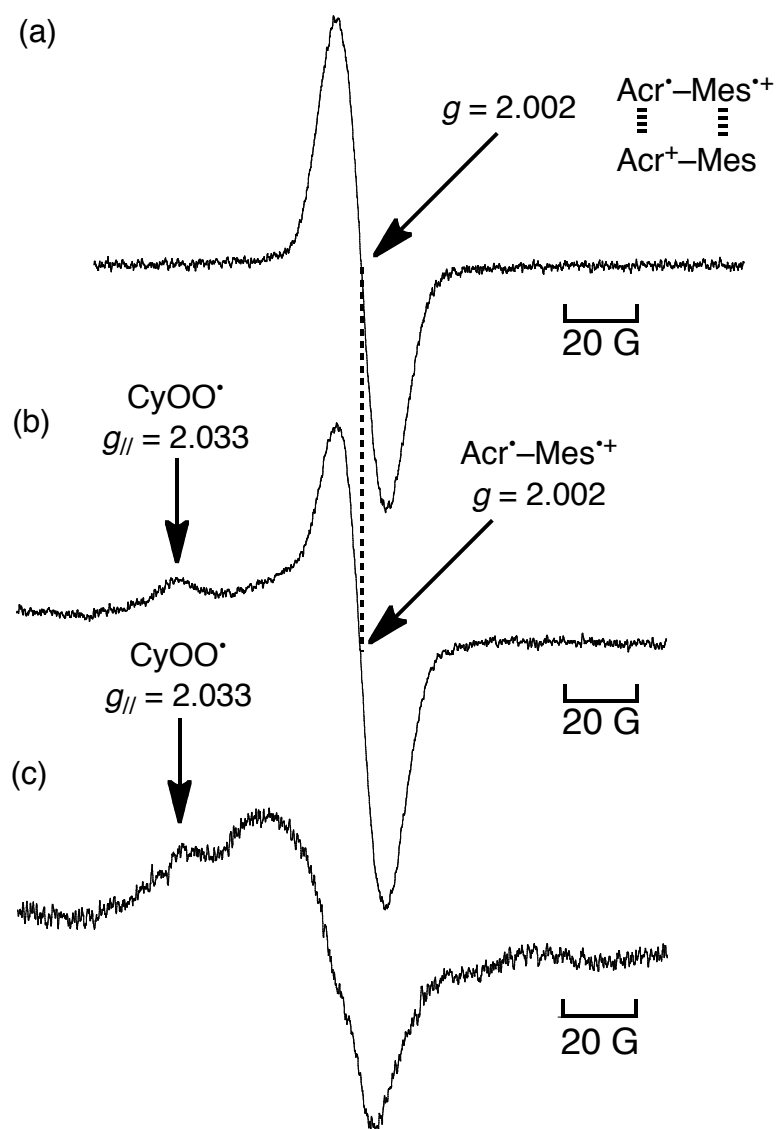

**Fig. S3** ESR spectra of (a)  $(\text{Acr}^\bullet\text{-Mes}^{\bullet+})(\text{Acr}^+-\text{Mes})$  generated by photoirradiation (1000-W Hg lamp) of  $\text{Acr}^+-\text{Mes}$  (10 mM) in deaerated MeCN, (b)  $\text{Acr}^\bullet\text{-Mes}$  and cyclohexyl peroxy radical generated by photoirradiation of  $\text{Acr}^+-\text{Mes}$  (10 mM) with HCl (60 mM) and cyclohexane (1.0 M) in  $\text{O}_2$ -saturated MeCN, (c) cyclohexyl peroxy radical generated by photoradiation of cyclohexane (1.0 M) with  $t\text{BuOO}t\text{Bu}$  (0.50 M) in  $\text{O}_2$ -saturated MeCN. The measurements were carried out at 77 K.
